# Supplementary material
Source: publisher figshare collection journal article supplement (https://tandf.figshare.com/ndownloader/files/18049205)

**Supplementary Online Content**

Bi WG, Emami E, Luo ZC, Santamaria C, Wei, SQ. Effect of periodontal treatment in pregnancy on perinatal outcomes: a systematic review and meta-analysis

**Appendix 1.** Literature search strategy

**Appendix 2.** Assessment of bias risk of the included randomized controlled trials

**Appendix 3** The funnel plot for the primary outcome of perinatal mortality

**Appendix** 4 Association between periodontal treatment in pregnancy and gestational age at birth (weeks)

**Appendix 1.** Literature search strategy

**#1 -** ("pregnancy"[MeSH Terms] OR "pregnancy"[All Fields] OR "gestation"[All Fields]) OR ("pregnant women"[MeSH Terms] OR "pregnant women"[All Fields] OR "pregnant woman"[All Fields] OR "pregnancy"[All Fields] OR "pregnancies"[All Fields]) OR ("gravidity"[MeSH Terms] OR "gravidity"[All Fields]) OR ("gravidity"[MeSH Terms] OR "gravidity"[All Fields] OR "gravidities"[All Fields]) OR ("gravidity"[MeSH Terms] OR "gravidity"[All Fields] OR "pregnant"[All Fields]) OR pregnants[All Fields]

**#2** - ("periodontitis"[MeSH Terms] OR "periodontitis"[All Fields]) OR "periodontal disease"[All Fields] OR "periodontal therapy"[All Fields] OR "periodontal treatment"[All Fields] OR "scaling and root planing"[All Fields] OR "periodontal intervention"[All Fields] OR "dental scaling"[All Fields] OR "root planing"[All Fields] OR "subgingival curettage"[All Fields] OR "root scaling"[All Fields] OR "subgingival scaling"[All Fields] OR "supragingival Scaling"[All Fields] OR "periodontal therapeutics"[All Fields] OR (periodontal[All Fields] AND ("therapeutics"[MeSH Terms] OR "therapeutics"[All Fields] OR "attachment loss, periodontal"[All Fields] OR "loss, periodontal attachment"[All Fields] OR "periodontal debridement"[All Fields] OR ("periodontal debridement"[MeSH Terms] OR ("periodontal"[All Fields] AND "debridement"[All Fields])

**#3** - ("pregnancy outcome"[MeSH Terms] OR ("pregnancy"[All Fields] AND "outcome"[All Fields]) OR "pregnancy outcome"[All Fields] OR ("outcome"[All Fields] AND "pregnancy"[All Fields])) OR (perinatal mortality [All Fields] OR "still birth"[MeSH Terms] OR "neonatal death"[All Fields]) OR (premature[All Fields] OR "premature birth"[MeSH Terms] OR "premature birth"[All Fields] OR preterm[All Fields] OR "preterm birth"[All Fields] OR "obstetric labor, premature"[MeSH Terms] OR "infant, premature"[MeSH Terms] OR ("infant, premature"[MeSH Terms] OR ("infant"[All Fields] AND "premature"[All Fields]) OR "premature infant"[All Fields] OR "prematurity"[All Fields]) OR "infant, birth weight"[MeSH Terms] OR "birth weight"[All Fields] OR "preterm delivery"[All Fields] OR ("pre-eclampsia"[MeSH Terms] OR "pre-eclampsia"[All Fields] OR ("pre"[All Fields] AND "eclampsia"[All Fields]) OR "pre eclampsia"[All Fields]) OR "pre eclampsia"[All Fields] OR ("pre-eclampsia"[MeSH Terms] OR "pre-eclampsia"[All Fields] OR "preeclampsia"[All Fields]) OR "gestational diabetes"[All Fields] OR "complication, pregnancy"[All Fields] OR "pregnancy complication"[All Fields] OR "complications, pregnancy"[All Fields]

**#4** **-** (#1 AND #2 AND #3)

**Appendix 2.** Assessment of bias risk of the included randomized controlled trials

| Study | Sequence generation | Allocation concealment | Blinding of participants and personnel | Blinding of outcome assessment | Incomplete outcome data | Selective outcome data | Other sources of bias |
| --- | --- | --- | --- | --- | --- | --- | --- |
| Farrell 2003 | Low | Unclear | High | Low | High | High | Unclear |
| Herrera 2009 | Low | Low | High | Unclear | Low | Low | Low |
| Jeffcoat 2003 | Low | Low | Low | Low | Low | Low | Low |
| Jeffcoat 2011 | Low | Low | Low | Low | Low | Low | Low |
| Khairnar 2015 | Unclear | Low | High | Low | Low | Low | Low |
| Lopez 2002 | Low | Unclear | High | Low | Low | Low | Unclear |
| Lopez 2005 | Low | Unclear | High | Low | Low | Low | Unclear |
| Macones 2010 | Low | Low | Low | Low | Low | Low | Low |
| Michalowicz 2006 | Low | Low | Low | Low | Low | Low | Low |
| Newnham 2009 | Low | Low | Low | Low | Low | Low | Low |
| Novak 2009 | Low | Low | High | Unclear | Low | Low | Unclear |
| Offenbacher 2006 | Unclear | Unclear | High | Low | Low | Low | Unclear |
| Offenbacher 2009 | Low | Low | Low | Low | High | Low | Low |
| Oliveira 2011 | Unclear | Low | High | Low | Low | Low | Unclear |
| Pirie 2013 | Low | Low | High | Unclear | Low | Low | Unclear |
| Radnai 2009 | Low | Low | High | Low | Low | Low | Low |
| Sadatmansouri 2006 | Unclear | Unclear | High | Unclear | Low | Low | Unclear |
| Sant’ana 2010 | Unclear | Unclear | High | Unclear | Low | Low | Unclear |
| Tarannum 2007 | Low | Low | High | Unclear | Low | Low | Unclear |
| Weidlich 2013 | Low | Low | High | Unclear | Low | Low | Unclear |

**Appendix 3** The funnel plot for the primary outcome of perinatal mortality


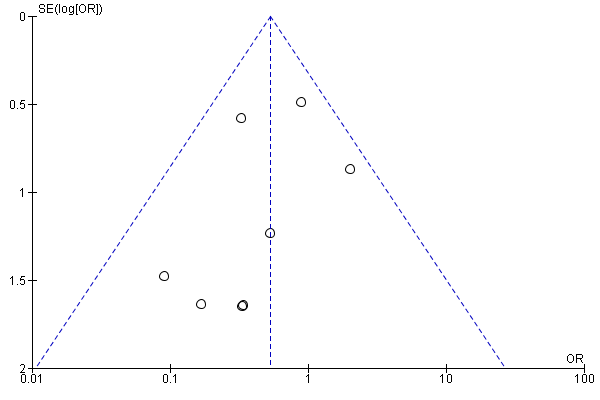


**Appendix** 4 Association between periodontal treatment in pregnancy and gestational age at birth (weeks)


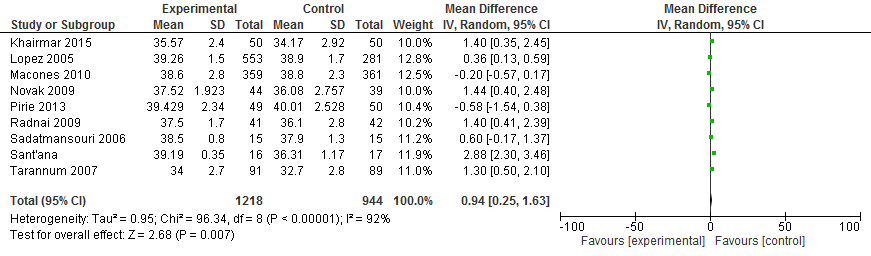

Supplement: Supplementary file 1 [file 18049205]
